# Supplementary material for: Enhanced protection conferred by mucosal BCG vaccination associates with presence of antigen-specific lung tissue-resident PD-1+ KLRG1− CD4+ T cells
Source: PubMed Central journal article supplement (PMC7051908; doi:10.1038/s41385-018-0109-1), 2018-11-16
Supplement: 41385_2018_109_MOESM1_ESM.pdf [file 41385_2018_109_MOESM1_ESM.pdf]

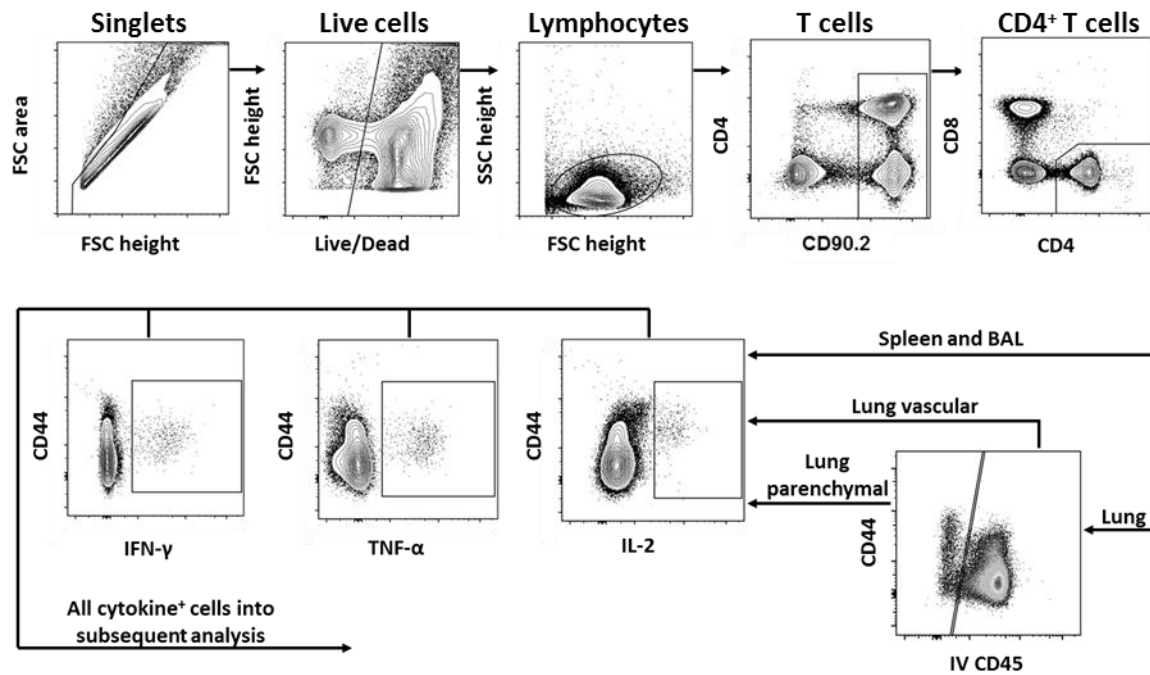

**Supplementary Figure 1 Gating strategy for identification of cytokine<sup>+</sup> CD4<sup>+</sup> T cells.** Cells are gated on singlets followed by live cells and then lymphocytes. T cells are identified as CD90.2<sup>+</sup> before gating on CD4<sup>+</sup> and identifying CD44<sup>hi</sup> cells producing IFN- $\gamma$ , TNF- $\alpha$  or IL-2 (cytokine<sup>+</sup>). Boolean gating is then used to identify all CD4<sup>+</sup> cells producing one or more of these cytokines. For analysis of lung lymphocytes, an additional step of gating based on intravascular stain is performed prior to identification of cytokine<sup>+</sup> cells.
