# Supplementary material for: Enhanced protection conferred by mucosal BCG vaccination associates with presence of antigen-specific lung tissue-resident PD-1+ KLRG1− CD4+ T cells
Source: PubMed Central journal article supplement (PMC7051908; doi:10.1038/s41385-018-0109-1), 2018-11-16
Supplement: 41385_2018_109_MOESM2_ESM.pdf [file 41385_2018_109_MOESM2_ESM.pdf]

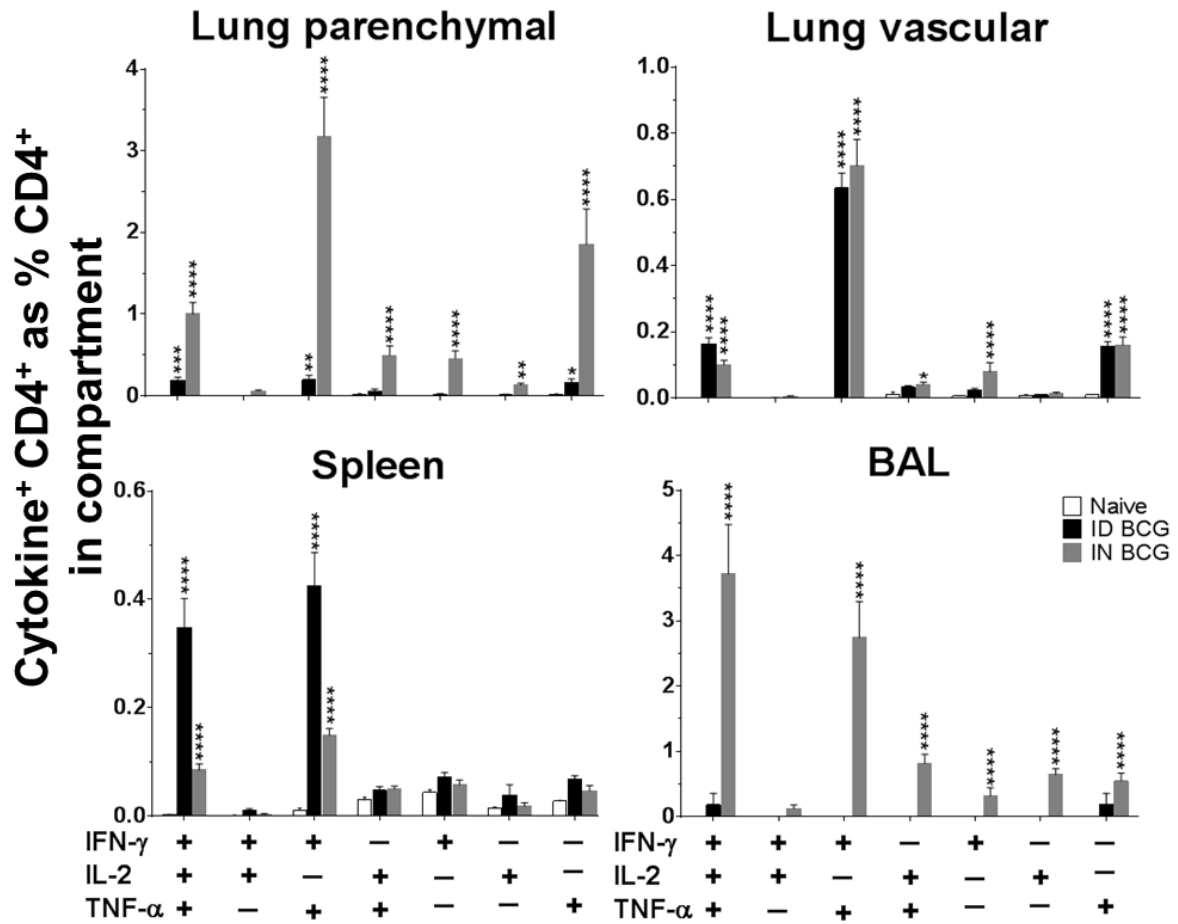

**Supplementary Figure 2 Frequency of antigen-specific CD4<sup>+</sup> T cells producing each cytokine combination.** Six weeks after immunisation with BCG via IN or ID route, intravascular staining & ICS identified populations of lung parenchymal and lung vascular PPD-T-specific (cytokine<sup>+</sup>) CD4<sup>+</sup> T cells producing IFN- $\gamma$ , TNF- $\alpha$  or IL-2 alone or in combination. Bars represent mean  $\pm$  SEM ( $n=6$ ). Statistical comparison is between naïve and BCG-immunised groups. Two-way ANOVA with Sidak's post-test \*  $P<0.05$ , \*\*  $P<0.01$ , \*\*\*  $P<0.001$  \*\*\*\*  $P<0.0001$ . Data representative of one of two independent experiments.
